# Supplementary material for: Halogen-modified metal–organic frameworks for efficient separation of alkane from natural gas
Source: Royal Society of Chemistry journal article supplement (doi:10.1039/d3dt01554h), 2023-01-01
Supplement: d3dt01554h1.pdf [file d3dt01554h1.pdf]

## Supporting Information

### Halogen-modified Metal–Organic Frameworks for Efficient Separation of Alkane from Natural Gas

Zhirong Song,<sup>a</sup> Yanchun Zheng,<sup>a</sup> Yiqi Chen,<sup>a</sup> Youlie Cai,<sup>a</sup> Rong-Jia Wei,<sup>b</sup> Junkuo Gao<sup>\*a</sup>

<sup>a</sup> Institute of Functional Porous Materials, School of Materials Science and Engineering, Zhejiang Sci-Tech University, Hangzhou 310018, China

<sup>b</sup> College of Chemistry and Materials Science, Jinan University, Guangzhou 510632, China

**\*Corresponding Author:**

Junkuo Gao

Tel.: (+86) 0571-86843618

E-mail: jkgao@zstu.edu.cn

## IAST adsorption selectivity

The selectivity of DMOF-X for CH<sub>4</sub>, C<sub>2</sub>H<sub>6</sub>, and C<sub>3</sub>H<sub>8</sub> was calculated using the ideal adsorption solution theory. The adsorption selectivity is defined by the following equation:

$$S_{ads} = \frac{q_1/q_2}{p_1/p_2}$$

In the formula,  $q_1$  and  $q_2$  are the adsorption capacity of component 1 and component 2 at equilibrium, and  $p_1$  and  $p_2$  are the gas partial pressures of component 1 and component 2.

## Isosteric heat of adsorption

The adsorption enthalpies of CH<sub>4</sub>(at 273 and 298K), C<sub>2</sub>H<sub>6</sub> (at 273 and 298K) and C<sub>3</sub>H<sub>8</sub> (at 273 and 298K) on DMOF-X were calculated using the Virial method. The steps are as follows: First, calculate the empirical constant  $a_i$  and  $b_i$  based on the adsorption data at different temperatures, and then calculate it using the following equation:

$$\ln P = \ln N + \frac{1}{T} \sum_{i=0}^m a_i N^i + \sum_{i=0}^n b_i N^i$$

Among them,  $N$  is the gas intake (mg g<sup>-1</sup>),  $P$  is the pressure (mmHg),  $T$  is the temperature (K),  $a$  and  $b$  are empirical constants,  $m$  and  $n$  are the number of coefficients required to adequately describe the isotherm. Then the following expression evaluates  $Q_{st}$ :

$$Q_{st} = -R \sum_{i=0}^m a_i N_i$$

where  $R$  is the gas constant.

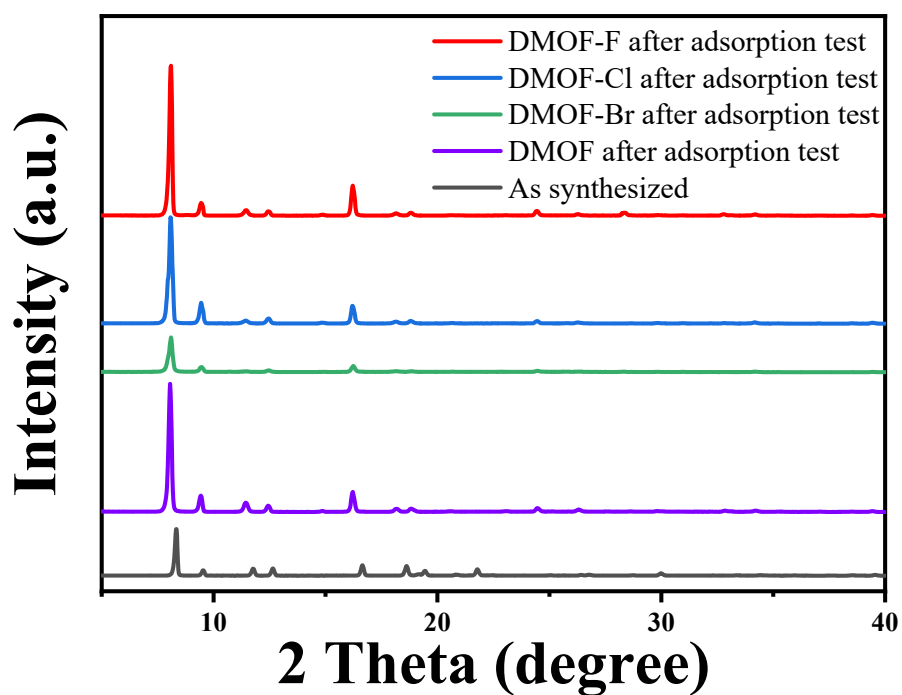

Figure S1. As-synthesized and after adsorbed PXRD patterns for DMOF-X.

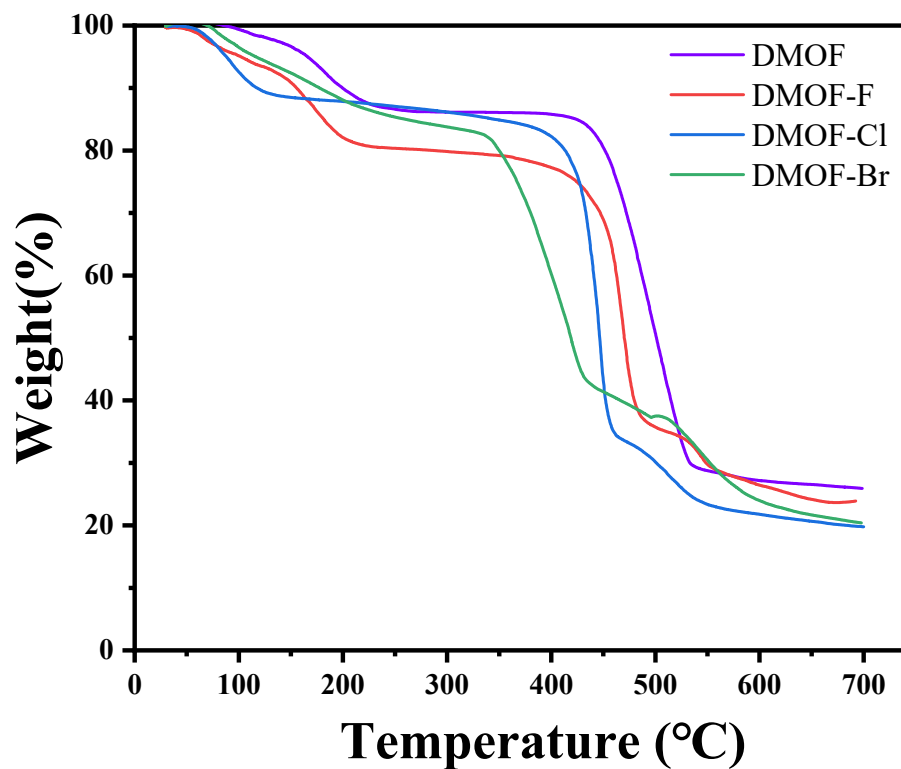

Figure S2. TGA curve of DMOF and DMOF-X under  $N_2$ .

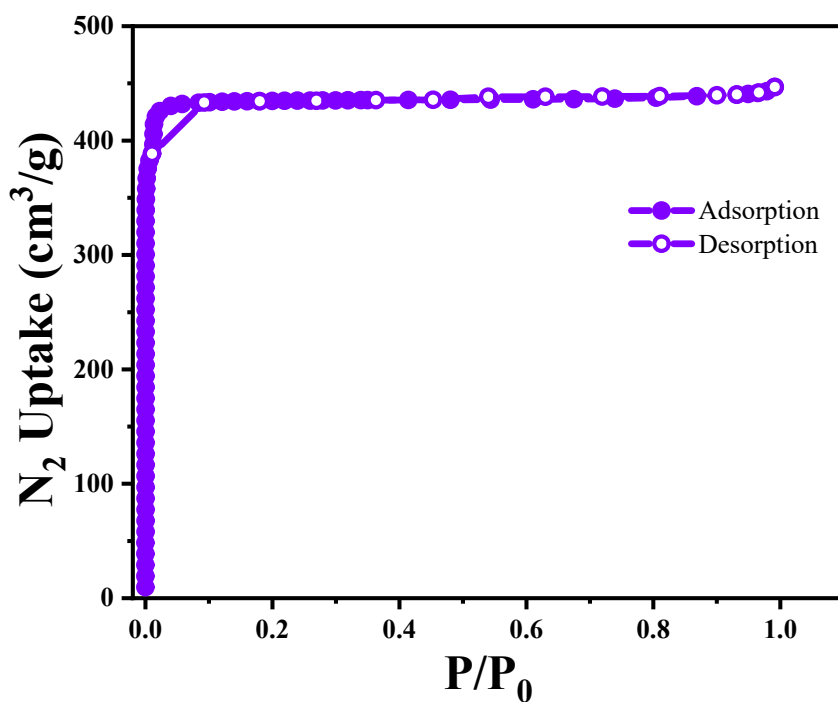

**Figure S3.** Nitrogen sorption isotherms at 77 K for DMOF.

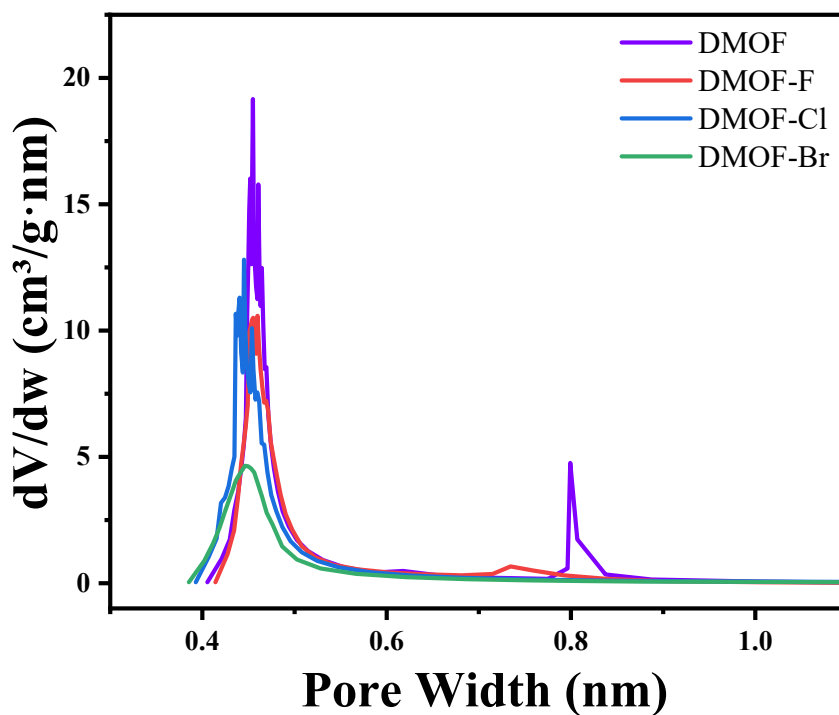

**Figure S4.** corresponding pore size distribution of DMOF-X calculated by DFT method.

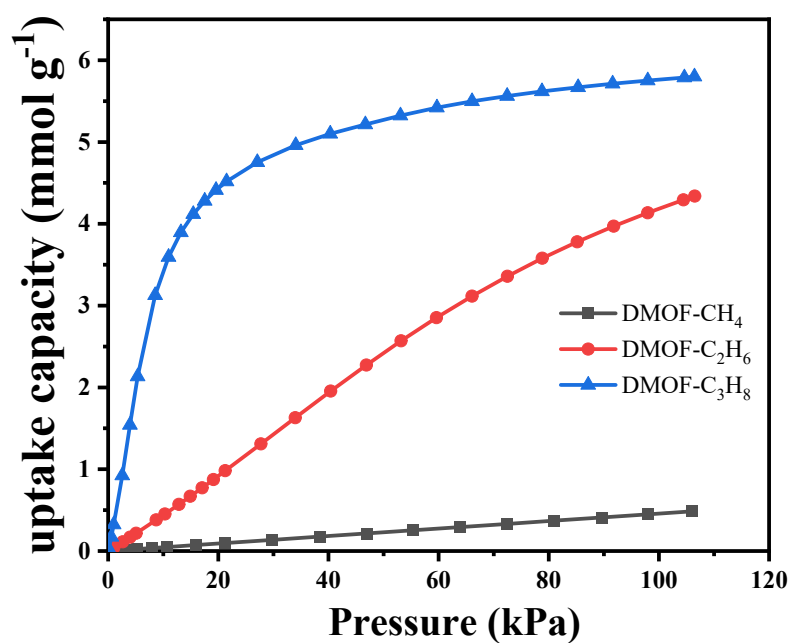

Figure S5. Single-component isotherms of CH<sub>4</sub>, C<sub>2</sub>H<sub>6</sub>, and C<sub>3</sub>H<sub>8</sub> for DMOF at 298 K.

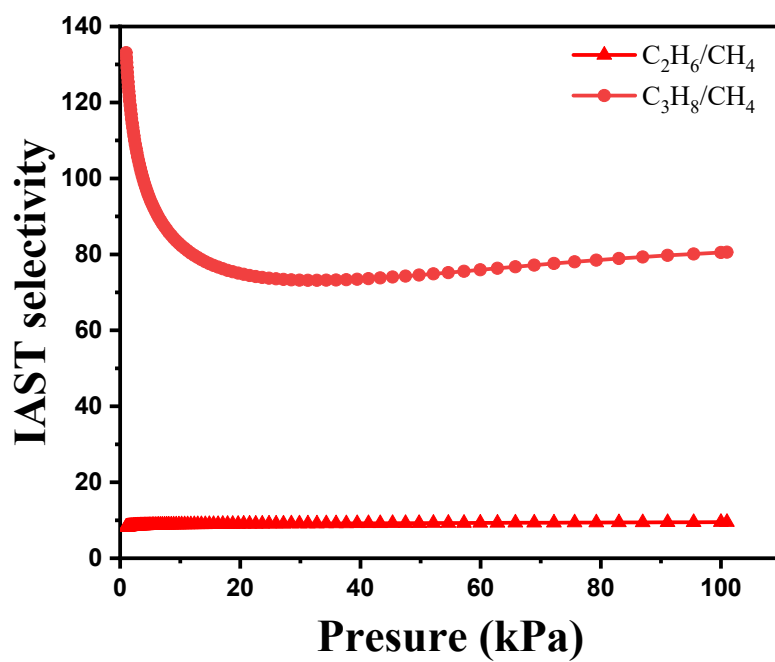

Figure S6. IAST selectivity of the DMOF.

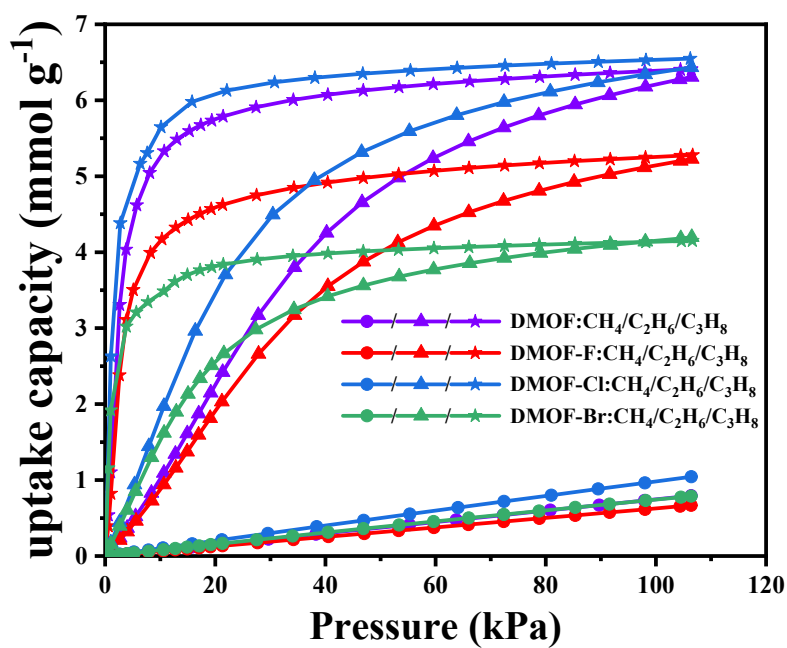

Figure S7.  $\text{CH}_4$ ,  $\text{C}_2\text{H}_6$ , and  $\text{C}_3\text{H}_8$  adsorption isotherms of DMOF-X at 273 K.

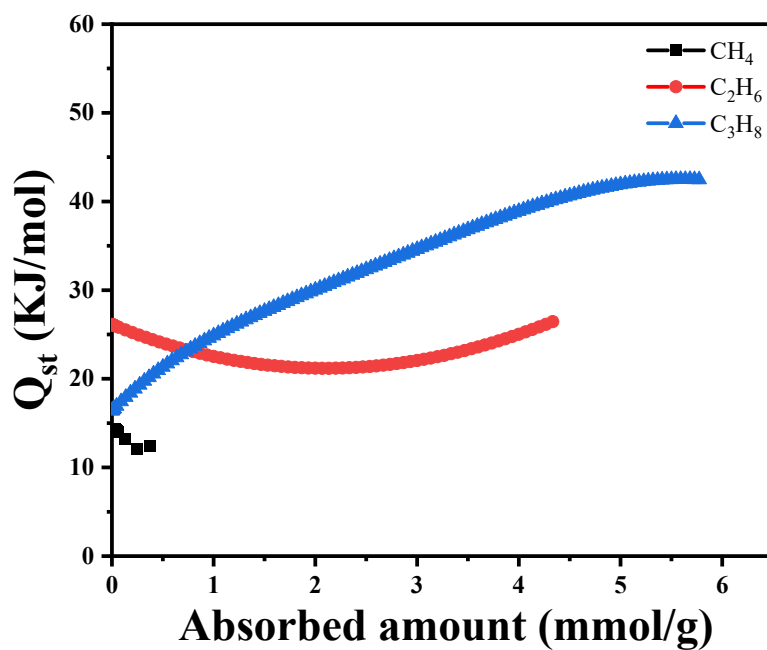

Figure S8. Isothermic heats of  $\text{C}_3\text{H}_8$ ,  $\text{C}_2\text{H}_6$ , and  $\text{CH}_4$  on DMOF.

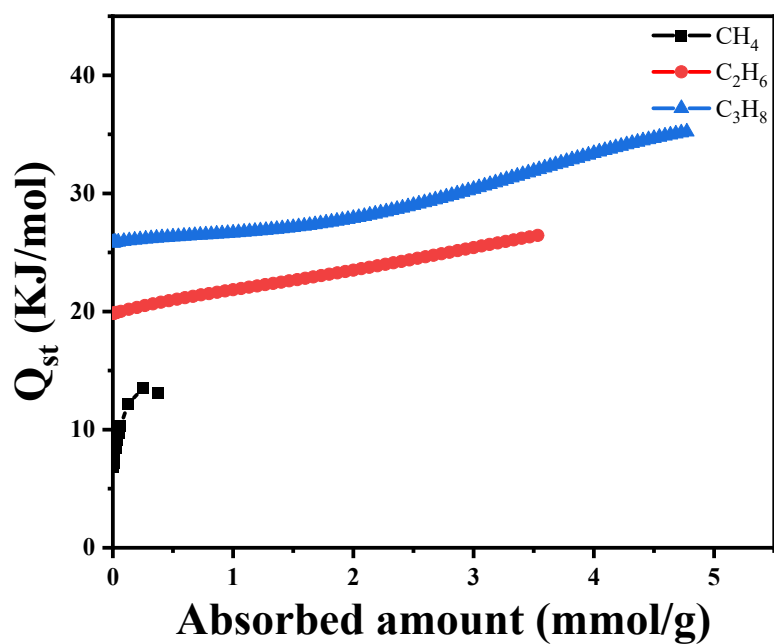

Figure S9. Isosteric heats of  $C_3H_8$ ,  $C_2H_6$ , and  $CH_4$  on DMOF-F.

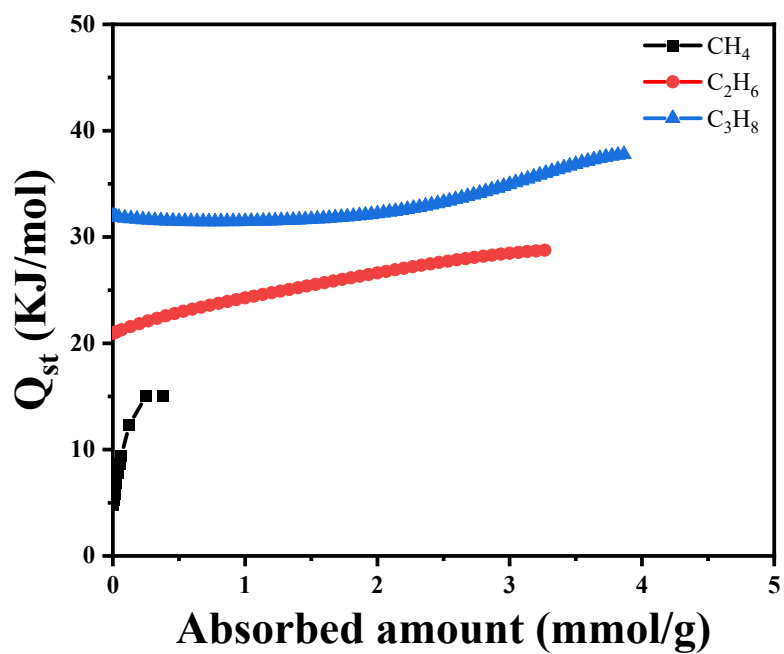

Figure S10. Isosteric heats of  $C_3H_8$ ,  $C_2H_6$ , and  $CH_4$  on DMOF-Br.

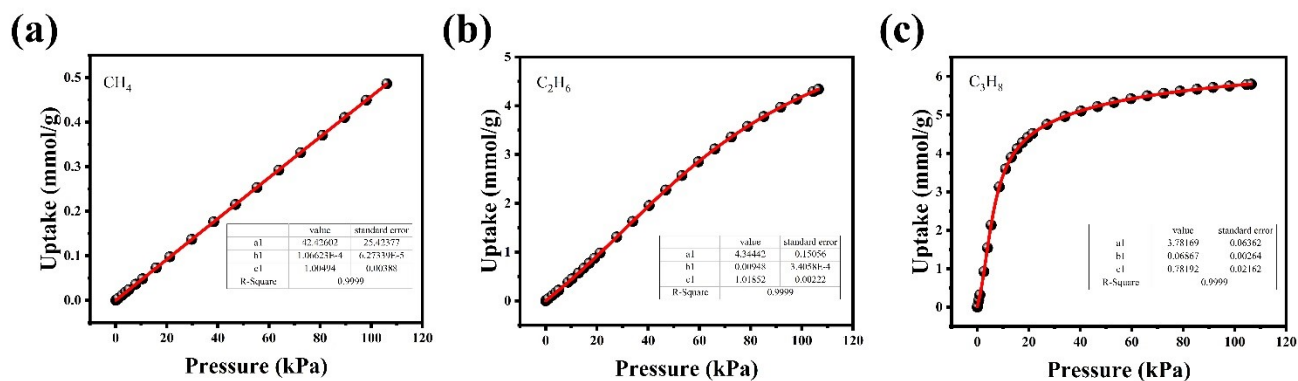

**Figure S11.** The fitting parameters for Single Sites Langmuir-Freundlich isotherms model for DMOF at 298K (a) CH<sub>4</sub> (b) C<sub>2</sub>H<sub>6</sub> (c) C<sub>3</sub>H<sub>8</sub>.

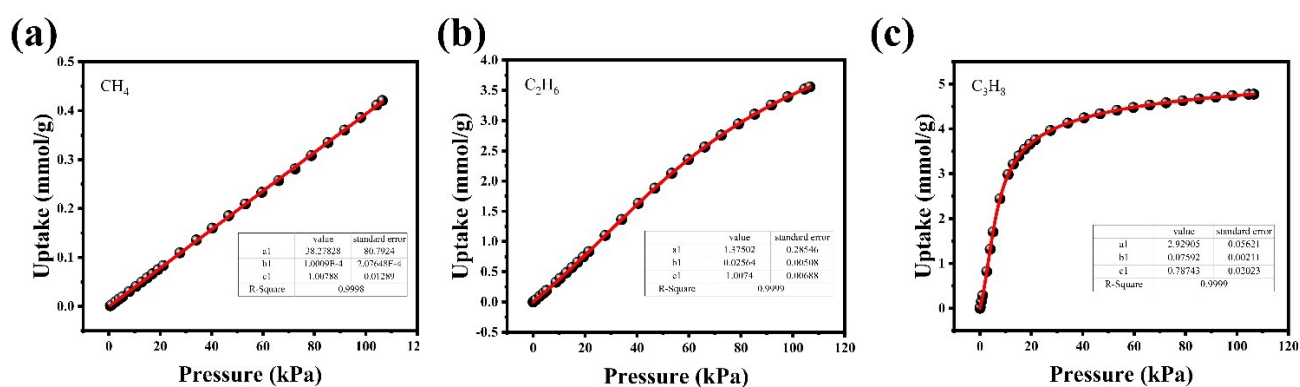

**Figure S12.** The fitting parameters for Single Sites Langmuir-Freundlich isotherms model for DMOF-F at 298K (a) CH<sub>4</sub> (b) C<sub>2</sub>H<sub>6</sub> (c) C<sub>3</sub>H<sub>8</sub>.



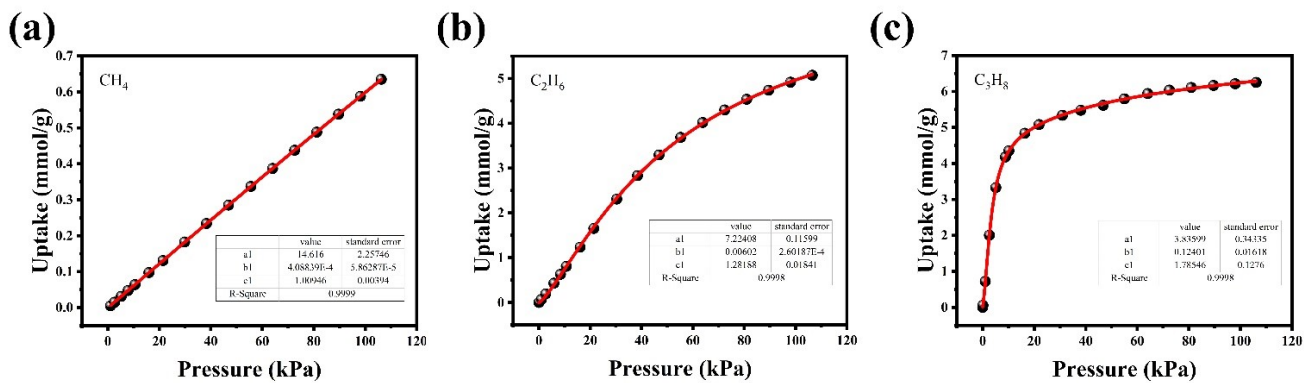

**Figure S13.** The fitting parameters for Single Sites Langmuir-Freundlich isotherms

model for DMOF-Cl at 298K (a) CH<sub>4</sub> (b) C<sub>2</sub>H<sub>6</sub> (c) C<sub>3</sub>H<sub>8</sub>.

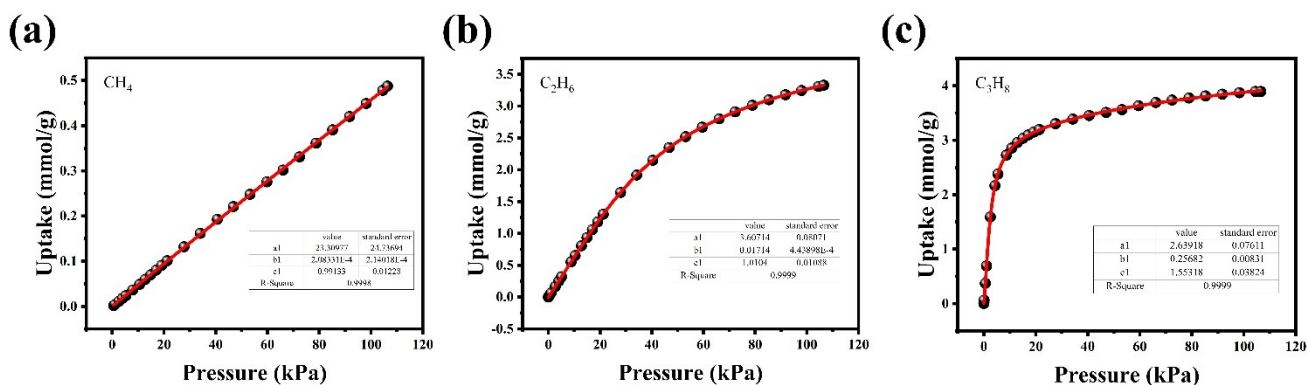

**Figure S14.** The fitting parameters for Single Sites Langmuir-Freundlich isotherms

model for DMOF-Br at 298K (a) CH<sub>4</sub> (b) C<sub>2</sub>H<sub>6</sub> (c) C<sub>3</sub>H<sub>8</sub>.

**Table S1.** Summary of CH<sub>4</sub>, C<sub>2</sub>H<sub>6</sub>, and C<sub>3</sub>H<sub>8</sub> adsorption capacities and C<sub>3</sub>H<sub>8</sub>/CH<sub>4</sub> and C<sub>2</sub>H<sub>6</sub>/CH<sub>4</sub> selectivities in various porous materials.

| Materials                           | C <sub>3</sub> H <sub>8</sub> | C <sub>2</sub> H <sub>6</sub> | CH <sub>4</sub> | C <sub>3</sub> H <sub>8</sub> /CH <sub>4</sub> | C <sub>2</sub> H <sub>6</sub> /CH <sub>4</sub> | Ref.             |
|-------------------------------------|-------------------------------|-------------------------------|-----------------|------------------------------------------------|------------------------------------------------|------------------|
|                                     | uptake                        | uptake                        | uptake          | selectivity                                    | selectivity                                    |                  |
|                                     | mmol/g                        | mmol/g                        | mmol/g          | (5/85)                                         | (10/85)                                        |                  |
| <b>DMOF-Cl</b>                      | <b>6.25</b>                   | <b>5.07</b>                   | <b>0.63</b>     | <b>130.9</b>                                   | <b>12.5</b>                                    | <b>This work</b> |
| <b>DMOF-F</b>                       | <b>4.78</b>                   | <b>3.56</b>                   | <b>0.42</b>     | <b>80.8</b>                                    | <b>9.5</b>                                     | <b>This work</b> |
| <b>DMOF-Br</b>                      | <b>3.90</b>                   | <b>3.33</b>                   | <b>0.49</b>     | <b>133.8</b>                                   | <b>13.8</b>                                    | <b>This work</b> |
| <b>DMOF</b>                         | <b>5.80</b>                   | <b>4.34</b>                   | <b>0.49</b>     | <b>80.5</b>                                    | <b>9.5</b>                                     | <b>This work</b> |
| MIL-101-Cr                          | 3.35                          | 1.59                          | 0.49            | 84.3                                           | 22.5                                           | 1                |
| MIL-101-Fe                          | 3.29                          | 1.25                          | 0.45            | 24.9                                           | 15.4                                           | 1                |
| MIL-101-Fe-NH <sub>2</sub>          | 3.32                          | 1.35                          | 0.46            | 42.5                                           | 11.6                                           | 1                |
| ZUL-C1                              | 2.72                          | 2.95                          | -               | 158                                            | 28                                             | 2                |
| ZUL-C2                              | 2.52                          | 2.82                          | -               | 741                                            | 82                                             | 2                |
| Cu-MOF                              | 5.98                          | 3.22                          | -               | 203.6                                          | 9.3                                            | 3                |
| MOF-303                             | 4.74                          | 4.96                          | 0.86            | 5114                                           | 26                                             | 4                |
| MIL-160                             | 5.08                          | 4.65                          | 0.94            | 174                                            | 20                                             | 4                |
| Ni(TMBDC)(DA<br>BCO) <sub>0.5</sub> | 5.54                          | 5.81                          | -               | 274                                            | 29                                             | 5                |

|                |      |      |      |       |      |    |
|----------------|------|------|------|-------|------|----|
| Zn-BPZ-SA      | 2.73 | 2.97 | 0.64 | 65.7  | 10.9 | 6  |
| RT-MIL-100(Fe) | 6.78 | 2.22 | 0.36 | 33.3  | 6.0  | 7  |
| LIFM-ZZ-1      | 4.06 | 2.80 | 0.39 | 338   | 16   | 8  |
| PAN-m1         | 3.42 | 2.53 | 0.63 | 222.8 | 23.1 | 9  |
| PAN-m3         | 4.01 | 2.72 | 0.71 | 296.3 | 17.4 | 9  |
| Cu-IPA         | 3.10 | 2.57 | 0.81 | 296   | 35   | 10 |

## References

1. L. Z. Qin, X. H. Xiong, S. H. Wang, L. Zhang, L. L. Meng, L. Yan, Y. N. Fan, T. A. Yan, D. H. Liu, Z. W. Wei and C. Y. Su, *ACS Appl. Mater. Interfaces*, 2022, **14**, 45444-45450.
2. J. Zhou, T. Ke, F. Steinke, N. Stock, Z. Zhang, Z. Bao, X. He, Q. Ren and Q. Yang, *J. Am. Chem. Soc.*, 2022, **144**, 14322-14329.
3. S.-M. Wang and Q.-Y. Yang, *Green Chem. Eng.*, 2023, **4**, 81-87.
4. S. Xian, J. Peng, H. Pandey, T. Thonhauser, H. Wang and J. Li, *Engineering*, 2022, DOI: 10.1016/j.eng.2022.07.017.
5. Y. Wu, Z. Liu, J. Peng, X. Wang, X. Zhou and Z. Li, *ACS Appl. Mater. Interfaces*, 2020, **12**, 51499-51505.
6. G.-D. Wang, R. Krishna, Y.-Z. Li, Y.-Y. Ma, L. Hou, Y.-Y. Wang and Z. Zhu, *ACS Mater. Lett.*, 2023, **5**, 1091-1099.
7. B. Yuan, X. Wang, X. Zhou, J. Xiao and Z. Li, *Chem. Eng. J.*, 2019, **355**, 679-686.
8. Z. Zeng, W. Wang, X. Xiong, N. Zhu, Y. Xiong, Z. Wei and J. J. Jiang, *Inorg. Chem.*, 2021, **60**, 8456-8460.
9. G. Li and Z. Wang, *ACS Appl. Mater. Interfaces*, 2020, **12**, 24488-24497.
10. D. Lin, S. Tu, L. Yu, Y. Yuan, Y. Wu, X. Zhou, Z. Li and Q. Xia, *Ind. Eng. Chem. Res.*, 2023, **62**, 5252-5261.
